# Supplementary material
Source: publisher figshare collection journal article supplement (https://geolsoc.figshare.com/ndownloader/files/5424761)
Supplement: Supplementary file 1 [file 5424761]

Strata	well	depth	La	Ce	Pr	Nd	Sm	Eu	Gd	Tb	Dy	Ho	Er	Tm	Yb	Lu
			ppm	ppm	ppm	ppm	ppm	ppm	ppm	ppm	ppm	ppm	ppm	ppm	ppm	ppm
Miocene	W3	2088	22.634	46.514	5.186	20.051	3.799	1.688	4.653	0.573	3.196	0.643	1.819	0.251	1.688	0.261
Miocene	W3	2108	31.056	64.300	6.907	26.708	5.008	1.769	6.157	0.680	3.658	0.730	1.989	0.290	1.839	0.270
Miocene	W3	2118	20.398	42.538	4.686	18.065	3.615	1.101	4.556	0.541	3.335	0.651	1.863	0.280	1.832	0.280
Miocene	W3	2138	39.292	83.415	9.173	34.340	6.402	1.651	7.282	0.830	4.761	0.890	2.511	0.360	2.411	0.340
Miocene	W3	2148	39.131	82.659	9.003	34.235	6.305	1.579	6.955	0.849	4.477	0.889	2.488	0.360	2.368	0.350
Miocene	W3	2178	39.335	83.036	9.059	34.492	6.518	1.505	6.777	0.817	4.684	0.907	2.541	0.359	2.422	0.349
Miocene	W3	2198	39.674	83.921	9.033	34.462	6.262	1.452	6.818	0.803	4.491	0.886	2.482	0.340	2.410	0.350
Miocene	W3	2208	38.851	83.388	8.907	34.100	6.230	1.510	6.593	0.805	4.358	0.845	2.345	0.332	2.305	0.322
Miocene	W3	2228	40.423	84.653	9.037	34.445	6.447	1.445	6.855	0.807	4.663	0.867	2.571	0.379	2.511	0.379
Miocene	W3	2238	37.495	78.217	8.565	32.371	5.957	1.421	6.535	0.792	4.475	0.913	2.588	0.396	2.375	0.375
Miocene	W3	2258	38.493	81.509	8.865	33.452	6.349	1.388	6.579	0.829	4.532	0.878	2.426	0.359	2.386	0.349
Miocene	W3	2268	36.531	76.628	8.291	31.287	5.654	1.359	6.084	0.759	4.285	0.789	2.268	0.330	2.188	0.330
Miocene	W3	2278	34.957	73.753	8.007	30.469	5.598	1.340	6.038	0.750	4.138	0.820	2.389	0.340	2.179	0.340
Miocene	W3	2298	38.728	82.538	8.762	33.517	6.211	1.310	6.101	0.810	4.571	0.910	2.481	0.370	2.381	0.350
Miocene	W3	2308	40.659	85.422	9.080	34.780	6.002	1.324	6.299	0.811	4.699	0.913	2.626	0.359	2.462	0.359
Miocene	W3	2318	39.412	84.098	8.977	34.258	6.125	1.301	6.075	0.781	4.594	0.851	2.512	0.360	2.322	0.360
Miocene	W3	2338	39.767	84.228	8.992	33.918	6.018	1.233	6.346	0.816	4.645	0.905	2.507	0.378	2.457	0.368
Miocene	W3	2348	38.428	80.652	8.583	32.473	5.895	1.259	5.955	0.779	4.486	0.879	2.428	0.360	2.398	0.350
Miocene	W3	2358	38.836	83.490	8.880	33.578	6.188	1.246	6.124	0.792	4.393	0.866	2.471	0.370	2.365	0.359
Miocene	W3	2378	42.099	89.836	9.511	36.250	6.542	1.324	6.612	0.853	4.806	0.943	2.649	0.401	2.528	0.371
Miocene	W3	2398	11.032	23.027	2.466	9.774	2.016	5.445	4.012	0.297	1.607	0.338	0.962	0.154	0.870	0.133
Miocene	W3	2418	39.088	83.717	8.795	33.549	5.950	1.693	7.593	0.781	4.418	0.841	2.404	0.361	2.284	0.341
Miocene	W3	2428	36.489	77.960	8.328	32.145	5.902	1.648	6.341	0.779	4.344	0.869	2.546	0.369	2.357	0.369
Miocene	W3	2438	42.851	86.927	9.452	37.085	6.670	1.517	6.840	0.824	4.972	0.924	2.612	0.392	2.461	0.372
Miocene	W3	2458	41.871	89.404	9.547	36.718	6.541	1.448	6.601	0.849	4.943	0.949	2.726	0.399	2.586	0.409
Miocene	W3	2468	40.131	84.568	9.335	34.600	6.384	2.118	6.866	0.823	4.818	0.974	2.670	0.391	2.570	0.371
Miocene	W3	2478	45.101	95.013	10.412	39.089	7.062	1.640	7.482	0.900	5.171	1.010	2.841	0.420	2.721	0.380
Miocene	W3	2498	36.405	77.784	8.436	32.072	5.724	1.651	6.605	0.771	4.233	0.851	2.492	0.350	2.362	0.370
Miocene	W3	2508	41.515	89.446	9.638	36.028	6.615	1.676	7.104	0.888	5.039	1.018	2.774	0.409	2.624	0.399
Miocene	W3	2518	41.139	88.827	9.464	36.697	6.629	1.757	7.008	0.849	4.941	0.918	2.765	0.379	2.645	0.389
Miocene	W3	2538	40.443	85.949	9.382	35.289	6.347	2.059	7.064	0.846	4.915	0.945	2.706	0.388	2.577	0.388
Miocene	W3	2548	17.063	35.816	3.963	15.412	3.066	3.647	5.307	0.438	2.526	0.499	1.416	0.194	1.345	0.194
Miocene	W3	2558	39.089	84.255	9.211	34.102	6.198	2.143	7.850	0.851	4.646	0.891	2.603	0.390	2.483	0.400
Miocene	W3	2578	43.277	92.254	9.928	37.306	6.822	1.843	7.934	0.872	5.139	0.972	2.875	0.411	2.705	0.421
Miocene	W3	2598	42.403	89.540	9.699	36.283	6.589	1.455	6.658	0.887	4.785	0.967	2.761	0.399	2.661	0.389
Miocene	W3	2628	38.577	82.222	8.906	33.308	5.985	1.249	5.904	0.776	4.574	0.877	2.489	0.353	2.408	0.353
Miocene	W3	2636	38.558	82.387	8.970	33.919	6.230	1.240	5.950	0.800	4.790	0.880	2.490	0.350	2.500	0.370
Miocene	W3	2644	37.808	79.573	8.723	33.412	6.045	1.149	6.085	0.789	4.596	0.849	2.618	0.370	2.478	0.370
Miocene	W3	2652	41.465	86.949	9.227	35.177	6.428	1.340	6.198	0.820	4.578	0.900	2.549	0.360	2.419	0.350
Miocene	W3	2660	39.580	83.447	9.025	34.722	6.317	1.239	6.007	0.790	4.578	0.870	2.599	0.360	2.559	0.380
Miocene	W3	2676	38.027	79.164	8.584	32.654	5.933	1.161	5.963	0.800	4.662	0.850	2.561	0.370	2.451	0.340
Miocene	W3	2684	38.069	80.809	8.718	33.259	6.293	1.162	6.133	0.832	4.650	0.912	2.716	0.381	2.465	0.351
Miocene	W3	2708	35.693	77.329	8.502	31.608	5.671	1.114	5.751	0.733	4.467	0.823	2.369	0.341	2.248	0.321
Miocene	W3	2716	30.157	63.553	6.987	26.549	4.588	0.840	4.498	0.590	3.359	0.680	1.909	0.250	1.829	0.280
Miocene	W3	2724	38.190	79.943	8.803	33.763	6.153	1.140	6.009	0.801	4.550	0.863	2.424	0.339	2.321	0.349
Miocene	W3	2740	32.373	67.963	7.465	27.767	5.127	1.083	4.851	0.684	3.809	0.756	2.083	0.306	2.073	0.296
Miocene	W3	2748	36.448	77.512	8.301	31.324	5.614	1.059	5.604	0.749	4.355	0.839	2.437	0.350	2.287	0.340
Miocene	W3	2756	38.154	80.778	8.701	33.153	6.101	1.130	5.481	0.770	4.600	0.890	2.530	0.350	2.410	0.370
Miocene	W3	2772	35.112	72.252	7.960	30.455	5.541	1.024	5.531	0.763	4.266	0.833	2.359	0.341	2.530	0.331
Miocene	W3	2788	36.618	76.471	8.323	31.770	5.929	1.082	5.389	0.761	4.387	0.841	2.444	0.351	2.394	0.351
Miocene	W3	2804	39.884	87.789	9.599	36.957	7.072	1.458	6.792	0.899	5.104	0.969	2.627	0.370	2.317	0.380
Miocene	W3	2812	38.852	83.180	9.037	34.483	6.154	1.157	6.045	0.788	4.868	0.898	2.623	0.389	2.484	0.359
Miocene	W3	2820	40.059	85.312	9.237	34.986	6.468	1.152	6.336	0.798	4.699	0.910	2.617	0.384	2.627	0.374
Miocene	W3	2838	34.846	74.355	8.034	30.434	5.573	1.060	5.192	0.750	4.082	0.790	2.211	0.320	2.151	0.320
Miocene	W3	2846	35.047	73.650	8.081	30.574	5.537	1.022	5.360	0.751	4.286	0.855	2.440	0.344	2.273	0.323
Miocene	W3	2854	37.158	77.240	8.362	31.890	5.967	1.048	5.428	0.738	4.350	0.848	2.425	0.359	2.295	0.359
Miocene	W3	2870	40.862	84.777	9.345	35.138	6.303	1.187	6.164	0.858	4.837	0.938	2.703	0.359	2.523	0.379
Miocene	W3	2878	37.501	78.146	8.539	32.356	6.057	1.071	5.736	0.751	4.535	0.871	2.503	0.380	2.353	0.340
Miocene	W3	2882	37.085	78.422	8.466	31.981	5.814	1.051	5.484	0.761	4.413	0.871	2.372	0.330	2.161	0.330
Miocene	W3	2898	40.572	84.804	9.346	35.377	6.488	1.504	6.558	0.842	4.873	0.973	2.828	0.401	2.527	0.381
Miocene	W3	2916	39.329	82.918	9.231	33.871	6.381	1.258	6.056	0.832	4.616	0.943	2.637	0.355	2.495	0.375
Miocene	W3	2932	39.007	79.867	8.865	32.696	6.111	1.302	6.090	0.801	4.588	0.882	2.564	0.381	2.544	0.361
Miocene	W3	2940	32.210	64.998	7.244	27.043	4.950	1.075	5.053	0.672	4.030	0.754	2.222	0.320	2.087	0.320
Miocene	W3	2948	27.009	53.956	6.110	23.345	4.257	0.906	4.455	0.572	3.445	0.666	1.967	0.291	1.801	0.271
Miocene	W3	2964	34.468	68.845	7.534	28.365	5.363	1.081	5.393	0.720	4.042	0.810	2.311	0.320	2.221	0.340
Miocene	W3	2972	30.492	62.312	6.971	25.788	4.654	0.999	4.774	0.649	3.845	0.759	2.117	0.320	2.017	0.280
Miocene	W3	2980	26.511	52.803	5.893	22.310	4.322	0.850	4.312	0.530	3.181	0.640	1.861	0.250	1.731	0.270
Miocene	W3	2996	34.989	71.050	7.857	29.315	5.605	1.111	5.715	0.741	4.334	0.851	2.352	0.320	2.342	0.330
Miocene	W3	3000	31.756	65.600	7.165	26.700	4.936	1.399	5.176	0.660	3.717	0.709	2.158	0.320	1.979	0.300
Miocene	W3	3004	36.131	75.003	8.086	30.707	5.483	1.186	5.463	0.738	4.177	0.798	2.293	0.319	2.243	0.329
Miocene	W3	3008	39.082	80.394	8.778	31.983	6.009	1.270	5.759	0.780	4.279	0.850	2.430	0.360	2.370	0.350
Miocene	W3	3012	35.289	72.763	8.037	29.795	5.494	1.107	5.385	0.698	4.128	0.798	2.283	0.329	2.293	0.329
Miocene	W3	3020	41.174	87.546	9.366	34.797	6.198	1.299	6.078	0.810	4.508	0.920	2.569	0.360	2.499	0.370
Miocene	W3	3032	39.086	79.703	8.740	32.999	5.957	1.292	5.687	0.781	4.265	0.841	2.363	0.370	2.393	0.340
Miocene	W3	3036	35.680	73.770	8.000	30.050	5.410	1.110	5.500	0.750	4.110	0.820	2.390	0.330	2.220	0.330
Miocene	W3	3044	41.104	85.507	9.331	34.334	6.251	1.256	6.091	0.817	4.606	0.887	2.542	0.369	2.482	0.359
Miocene	W3	3048	42.623	90.640	9.799	36.350	7.002	1.388	6.783	0.869	5.064	0.939	2.727	0.390	2.607	0.380
Miocene	W3	3052	33.813	69.681	7.573	28.166	5.338	1.177	5.168	0.718	3.971	0.748	2.125	0.329	2.035	0.289
Miocene	W3	3060	36.747	74.823	8.159	31.487	5.909	1.100	5.599	0.730	4.340	0.830	2.400	0.340	2.260	0.330
Miocene	W3	3064	33.462	70.490	7.542	28.441	5.403	4.529	6.769	0.703	3.897	0.743	2.049	0.331	2.009	0.301
Miocene	W3	3068	23.094	47.724	5.095	19.624	3.729	9.533	10.061	0.519	2.742	0.548	1.446	0.249	1.416	0.229
Miocene	W3	3076	35.611	74.360	7.906	30.244	5.607	2.619	8.705	0.730	4.068	0.780	2.169	0.300	2.079	0.310
Miocene	W3	3080	34.594	71.828	7.778	29.667	5.500	1.917	7.196	0.733	4.155	0.773	2.258	0.321	2.238	0.331
Miocene	W3	3084	33.719	69.664	7.725	28.774	5.318	1.762	7.050	0.705	3.928	0.786	2.296	0.332	2.135	0.312
Miocene	W3	3096	31.031	64.607	6.975	26.372	4.999	4.730	8.561	0.669	3.961	0.748	2.115	0.289	2.045	0.289
Miocene	W3	3100	33.486	68.218	7.419	28.490	5.156	1.725	7.120	0.668	3.929	0.748	2.164	0.299	2.074	0.309
Miocene	W3	3108	30.423	62.565	6.688	25.414	4.569	3.719	7.388	0.610	3.559	0.680	2.020	0.310	1.930	0.290
Miocene	W3	3112	32.887	69.723	7.569	29.107	5.319	1.750	7.149	0.690	4.100	0.790	2.190	0.330	2.140	0.320
Miocene	W3	3116	34.836	72.861	7.868	29.468	5.438	1.620	6.856	0.729	4.152	0.759	2.218	0.324	2.228	0.344
Miocene	W3	3124	36.711	75.662	8.278	31.313	5.749	1.710	7.438	0.780	4.399	0.830	2.379	0.330	2.219	0.340
Oligocene	W3	3184	22.479	47.084	4.961	19.375	3.743	3.114	6.239	0.519	2.995	0.559	1.597	0.250	1.477	0.230
Oligocene	W3	3192	20.190	42.480	4.548	17.552	3.478	2.649	5.617	0.460	2.639	0.510	1.429	0.200	1.389	0.200
Oligocene	W3	3196	24.858	52.029	5.546	21.114	4.105	3.624	6.968	0.561	3.184	0.601	1.812	0.270	1.672	0.230
Oligocene	W3	3200	31.667	66.551	7.215	27.290	5.166	4.067	8.084	0.680	3.747	0.739	2.039	0.300	1.999	0.290
Oligocene	W3	3208	31.634	67.259	7.165	27.240	5.059	1.723	6.883	0.705	3.819	0.726	2.036	0.312	2.026	0.302
Oligocene	W3	3212	30.950	63.448	6.787	25.218	4.746	5.138	8.708	0.654	3.791	0.714	2.001	0.292	1.790	0.261
Oligocene	W3	3224	23.622	49.756	5.415	20.789	4.124	2.242	6.126	0.551	3.253	0.631	1.742	0.260	1.642	0.230
Oligocene	W3	3228	23.986	50.296	5.537	20.563	4.041	2.225	6.186	0.549	3.143	0.629	1.786	0.259	1.776	0.239
Oligocene	W3	3232	26.155	54.495	5.927	22.792	4.311	2.285	6.496	0.599	3.363	0.629	1.796	0.249	1.696	0.259
Oligocene	W3	3240	31.495	66.402	7.220	28.011	5.120	2.070	6.654	0.707	4.039	0.757	2.171	0.333	2.110	0.313
Oligocene	W3	3244	27.176	57.067	6.258	23.514	4.631	2.056	6.597	0.629	3.453	0.679	1.926	0.279	1.886	0.269
Oligocene	W3	3248	33.150	69.700	7.677	29.362	5.703	2.522	7.428	0.768	4.167	0.768	2.293	0.319	2.104	0.299
Oligocene	W3	3256	34.127	72.257	7.918	30.073	5.651	1.837	7.069	0.829	4.593	0.889	2.516	0.379	2.566	0.369
Oligocene	W3	3260	34.160	72.187	7.793	29.704	5.455	1.848	6.564	0.759	4.026	0.779	2.388	0.330	2.188	0.340
Oligocene	W3	3264	33.462	70.176	7.718	29.146	5.560	2.339	6.845	0.773	4.366	0.843	2.479	0.361	2.349	0.351
Oligocene	W3	3272	34.225	72.317	7.796	29.787	5.707	2.529	7.087	0.790	4.518	0.850	2.539	0.370	2.499	0.370
Oligocene	W3	3276	36.193	75.670	8.125	30.933	5.610	1.587	6.628	0.719	4.122	0.818	2.346	0.339	2.236	0.329
Oligocene	W3	3280	35.240	81.844	9.487	40.313	9.107	2.596	10.675	1.288	6.770	1.178	3.016	0.399	2.457	0.369
Oligocene	W3	3292	41.170	87.798	9.683	37.016	7.134	2.087	7.325	0.963	5.499	1.084	2.970	0.442	2.850	0.421
Oligocene	W3	3296	45.033	94.269	10.340	39.367	7.466	3.805	8.233	1.033	5.656	1.125	3.079	0.430	2.874	0.419
Oligocene	W3	3304	41.685	89.467	9.784	37.388	7.306	2.059	7.426	0.919	5.117	0.959	2.718	0.390	2.668	0.390
Oligocene	W3	3308	43.291	91.411	9.927	38.763	7.326	2.435	7.885	0.984	5.771	1.129	3.088	0.456	3.067	0.425
Oligocene	W3	3312	46.535	97.992	10.656	40.972	7.524	2.071	7.884	1.021	5.663	1.101	3.202	0.460	3.042	0.450
Oligocene	W3	3320	46.807	98.771	10.794	41.051	7.562	1.696	8.041	1.018	5.676	1.057	3.073	0.449	2.893	0.429
Oligocene	W3	3324	35.269	71.989	8.017	30.475	5.625	1.221	5.905	0.751	4.644	0.881	2.592	0.390	2.632	0.370
Oligocene	W3	3328	39.899	84.547	9.077	35.420	6.568	1.869	6.918	0.880	5.189	0.960	2.809	0.400	2.689	0.390
Oligocene	W3	3336	46.534	98.021	10.717	41.220	7.731	1.798	7.920	1.029	5.883	1.159	3.316	0.499	3.196	0.459
Oligocene	W3	3340	39.745	84.530	9.301	36.264	7.141	1.300	7.281	0.940	5.501	1.070	2.970	0.420	2.790	0.420
Oligocene	W3	3344	43.655	93.017	10.149	39.080	7.337	2.058	7.357	0.968	5.707	1.090	3.016	0.438	2.813	0.428
Oligocene	W3	3352	43.986	92.840	10.234	39.544	7.442	1.702	7.649	1.038	5.823	1.162	3.186	0.467	3.020	0.446
Oligocene	W3	3356	44.707	94.324	10.411	39.869	7.390	1.307	7.472	1.000	5.900	1.072	3.113	0.459	2.940	0.439
Oligocene	W3	3360	44.373	94.359	10.261	39.606	7.558	1.845	7.488	0.967	5.694	1.097	3.121	0.469	3.041	0.449
Oligocene	W3	3368	44.419	94.499	10.342	39.598	7.472	1.840	7.372	0.990	5.681	1.070	2.981	0.450	2.871	0.410
Oligocene	W3	3372	40.238	84.262	9.148	34.865	6.522	1.149	6.442	0.849	4.854	0.949	2.726	0.399	2.746	0.399
Oligocene	W3	3376	41.246	87.297	9.461	36.839	6.969	2.233	7.079	0.937	5.274	1.007	2.831	0.429	2.802	0.399
Oligocene	W3	3384	39.522	83.801	9.185	34.506	6.582	2.304	7.190	0.908	5.335	1.017	2.842	0.429	2.782	0.409
Oligocene	W3	3388	43.078	91.459	9.886	37.704	7.155	1.431	7.325	0.921	5.323	1.041	2.892	0.410	2.782	0.420
Oligocene	W3	3392	43.298	91.306	9.932	37.932	7.080	1.744	7.100	0.944	5.664	1.088	3.027	0.451	2.883	0.441
Oligocene	W3	3400	43.890	92.587	9.893	38.574	7.365	2.438	7.575	1.019	5.836	1.199	3.248	0.500	3.228	0.470
Oligocene	W3	3404	45.308	97.513	10.505	40.710	7.456	1.599	7.536	1.010	5.887	1.119	3.148	0.480	3.059	0.450
Oligocene	W3	3408	44.009	94.398	10.166	39.382	7.622	2.895	8.263	1.082	6.360	1.222	3.495	0.501	3.475	0.501
Oligocene	W3	3416	45.723	97.438	10.753	41.962	8.462	1.710	9.033	1.210	7.202	1.360	3.791	0.540	3.701	0.520
Oligocene	W3	3420	42.653	91.062	9.941	37.498	7.344	1.669	7.583	1.039	6.045	1.169	3.307	0.470	3.127	0.460
Oligocene	W3	3424	40.869	87.644	9.425	35.272	6.497	1.259	6.447	0.880	5.007	1.009	2.719	0.410	2.659	0.380
Oligocene	W3	3432	38.113	81.957	8.963	34.562	6.772	1.801	6.972	0.950	5.222	1.050	2.931	0.450	2.791	0.410
Oligocene	W3	3436	47.420	100.752	11.054	42.697	8.248	1.438	8.647	1.168	6.580	1.258	3.585	0.539	3.435	0.489
Oligocene	W3	3440	45.063	94.897	10.332	39.362	7.337	1.937	7.757	1.008	5.940	1.208	3.414	0.479	3.404	0.469
Oligocene	W3	3448	44.354	94.918	10.328	39.907	7.238	1.924	7.427	0.957	5.244	1.047	2.841	0.419	2.612	0.409
Oligocene	W3	3452	36.611	80.503	9.082	36.902	8.268	1.831	9.022	1.297	7.473	1.479	3.953	0.563	3.681	0.543
Oligocene	W3	3456	45.348	98.567	10.682	41.897	8.161	1.970	8.692	1.170	6.741	1.300	3.691	0.530	3.321	0.520
Oligocene	W3	3464	43.623	92.402	10.004	39.056	7.375	1.469	7.365	1.009	5.906	1.169	3.248	0.480	2.998	0.460
Oligocene	W3	3468	44.043	93.829	10.276	39.351	7.760	1.401	8.078	1.083	6.263	1.242	3.514	0.510	3.227	0.478
Oligocene	W3	3472	44.494	93.541	10.248	39.320	7.856	2.082	8.436	1.141	6.355	1.241	3.523	0.500	3.373	0.490
Oligocene	W3	3480	43.017	91.188	9.967	38.825	7.571	1.745	7.711	1.003	5.786	1.153	3.139	0.451	3.048	0.451
Oligocene	W3	3484	37.664	81.479	8.942	34.683	6.759	1.176	6.819	0.907	4.835	0.927	2.622	0.389	2.442	0.359
Oligocene	W3	3488	45.887	97.946	10.811	40.978	7.665	1.793	7.765	1.032	5.931	1.152	3.306	0.461	3.026	0.461
Oligocene	W3	3496	42.271	89.978	9.810	38.543	7.456	2.182	7.567	1.041	5.678	1.121	3.132	0.455	2.940	0.414
Oligocene	W3	3500	45.174	95.929	10.382	40.154	7.916	1.413	7.826	0.982	5.732	1.082	3.096	0.451	2.966	0.441
Oligocene	W3	3508	42.768	92.898	9.926	37.319	6.821	1.272	6.981	0.911	5.288	1.022	2.955	0.411	2.794	0.401
Oligocene	W3	3524	43.107	91.078	9.969	37.592	6.986	1.211	6.576	0.881	5.214	1.021	2.842	0.420	2.802	0.420
Oligocene	W3	3532	43.134	92.681	9.918	38.626	7.735	1.209	7.151	0.973	5.369	1.035	2.920	0.441	2.848	0.410
Oligocene	W3	3540	41.169	87.745	9.301	36.294	6.728	1.221	6.838	0.941	5.306	1.011	3.024	0.461	2.893	0.451
Oligocene	W3	3556	40.885	87.277	9.694	36.158	6.616	1.129	6.436	0.899	5.167	0.979	2.868	0.410	2.718	0.400
Oligocene	W3	3564	32.308	68.784	7.457	29.009	5.388	0.850	5.068	0.710	3.978	0.780	2.319	0.350	2.279	0.320
Oligocene	W3	3572	39.579	86.024	9.257	35.948	6.665	1.079	6.685	0.918	5.062	0.988	2.773	0.413	2.713	0.383
Oligocene	W3	3588	42.202	91.515	9.773	38.193	7.180	1.097	6.791	0.947	5.255	1.057	3.101	0.439	2.982	0.459
Oligocene	W3	3596	43.799	95.577	10.082	40.010	7.659	1.217	7.260	0.997	5.176	1.027	2.882	0.429	2.822	0.409
Oligocene	W3	3604	42.975	93.254	10.052	36.890	7.364	1.259	7.104	0.899	5.336	1.049	3.038	0.440	2.828	0.450
Oligocene	W3	3620	41.293	89.173	9.630	37.115	7.230	1.382	7.423	1.028	5.934	1.200	3.331	0.461	3.224	0.482
Oligocene	W3	3628	45.257	97.851	10.622	39.779	7.725	1.375	7.630	0.997	5.447	1.050	2.750	0.420	2.697	0.388
Oligocene	W3	3636	37.694	82.907	8.895	33.353	6.416	1.437	6.537	0.870	4.827	0.951	2.742	0.395	2.641	0.405
Oligocene	W3	3652	41.227	89.972	9.645	36.544	7.109	1.777	7.079	0.929	5.362	1.038	3.005	0.399	2.876	0.399
Oligocene	W3	3660	39.608	86.112	9.253	34.646	6.810	2.065	6.756	0.876	4.843	0.951	2.594	0.400	2.540	0.368
Oligocene	W3	3668	38.859	83.236	9.084	33.591	6.610	2.193	6.830	0.881	5.158	0.971	2.804	0.401	2.594	0.401
Oligocene	W3	3684	39.845	84.542	9.113	34.123	6.322	1.270	6.422	0.840	4.662	0.930	2.521	0.400	2.591	0.400
Oligocene	W3	3692	36.172	78.066	8.303	31.881	6.112	1.150	6.032	0.780	4.592	0.880	2.491	0.360	2.381	0.360
Oligocene	W3	3700	37.524	81.506	8.881	33.729	7.055	1.282	6.520	0.918	4.996	0.979	2.806	0.414	2.654	0.384
Oligocene	W3	3716	42.471	94.793	10.372	38.980	8.025	1.675	8.396	1.174	6.550	1.274	3.481	0.502	3.260	0.471
Oligocene	W3	3724	38.405	84.485	9.226	34.713	6.904	1.471	7.545	1.001	5.644	1.101	3.192	0.450	2.892	0.430
Oligocene	W3	3732	39.198	85.327	9.246	34.460	6.732	1.267	6.832	0.888	5.216	0.997	2.833	0.409	2.643	0.399
Oligocene	W3	3748	46.364	100.440	10.945	40.646	7.530	1.412	7.530	1.001	5.568	1.061	3.114	0.461	2.944	0.451
Oligocene	W3	3756	30.534	65.666	7.089	26.985	5.381	1.099	5.187	0.702	3.977	0.743	2.258	0.315	2.136	0.325
Oligocene	W3	3764	40.127	87.107	9.260	35.502	6.933	1.289	6.633	0.869	4.745	0.899	2.647	0.400	2.527	0.400
Oligocene	W3	3780	30.074	67.395	7.388	28.476	5.498	0.965	5.820	0.834	4.583	0.874	2.523	0.352	2.402	0.352
Oligocene	W3	3788	38.493	84.651	9.129	33.638	6.671	1.214	6.411	0.873	4.926	0.983	2.849	0.391	2.648	0.401
Oligocene	W3	3804	38.649	84.327	9.157	34.390	6.518	1.160	6.558	0.870	4.799	0.950	2.749	0.390	2.589	0.390
Oligocene	W3	3812	33.376	73.521	8.021	30.051	5.778	1.061	5.578	0.751	4.336	0.851	2.403	0.350	2.323	0.340
Oligocene	W3	3820	42.360	89.789	9.640	36.320	6.960	1.240	7.030	0.920	5.220	0.940	2.770	0.400	2.670	0.380
Oligocene	W3	3836	34.979	78.419	8.251	31.614	6.419	1.142	6.159	0.841	4.887	0.941	2.624	0.381	2.564	0.391
Oligocene	W3	3840	32.545	72.062	7.681	29.265	5.861	0.940	5.961	0.770	4.481	0.840	2.380	0.350	2.290	0.340
Oligocene	W3	3846	33.286	73.826	7.634	29.358	5.456	0.989	5.256	0.670	3.947	0.789	2.218	0.330	2.268	0.320
